# Supplementary material
Source: publisher figshare collection journal article supplement (https://acs.figshare.com/ndownloader/files/23334185)
Supplement: Supplementary file 1 [file 23334185]

## **Supporting Information**

### **Insight into the Construction of (3,6)-connected rtl, ant and Chiral anh Nets Based on Structural Investigation of Several MOFs via Steric Tuning of Linkers**

Hui-Yan Liu\*, Kang Wang, Yi Sun, Rui Wang and Hai-Ying Wang\*

School of Chemistry & Materials Science, Jiangsu Key Laboratory of Green Synthetic Chemistry for Functional Materials, Jiangsu Normal University, Xuzhou 221116, P. R. China

## EXPERIMENTAL SECTION

**Synthesis of ligand (L-OCH<sub>3</sub>).** A mixture of 3,5-dibromo-4-methoxybenzoate (2.0 g, 6.2 mmol), pyridin-4-ylboronic acid (2.5 g, 20.3 mmol), K<sub>3</sub>PO<sub>4</sub> (15.0 g, 56.3 mmol), and Pd(PPh<sub>3</sub>)<sub>4</sub> (0.5 g, 0.4 mmol) was added to 1,4-dioxane (100 mL) and heated to 80 °C for 3 days under N<sub>2</sub> atmosphere. The resultant was taken up in CH<sub>2</sub>Cl<sub>2</sub> and the CH<sub>2</sub>Cl<sub>2</sub> solution was evaporated to dryness. The residue was washed briefly with ethanol to gain crude products, which were hydrolyzed by refluxing in 2 M aqueous NaOH and followed by acidification with 37% HCl to afford final products. Yield = 1.4 g (78.9 %). <sup>1</sup>H NMR (400 MHz, DMSO-*d*<sub>6</sub>,  $\delta$  ppm): 13.28 (s, COOH), 8.71 (d, 4H, *J* = 4.0 Hz, ArH), 8.01 (s, 2H, ArH), 7.65 (d, 4H, *J* = 8.0 Hz, ArH), 3.24 (s, 3H, CH<sub>3</sub>). Anal. Calcd (Found) for C<sub>18</sub>H<sub>14</sub>N<sub>2</sub>O<sub>3</sub>: C, 70.58 (70.66); H, 4.61 (4.67); N, 9.15 (9.05) %. IR (KBr, cm<sup>-1</sup>): 3040, 2994, 1698, 1606, 1547, 1463, 1431, 1399, 1333, 1250, 1234, 1220, 1125, 1073, 1017, 994, 834, 777, 696, 626, 608.

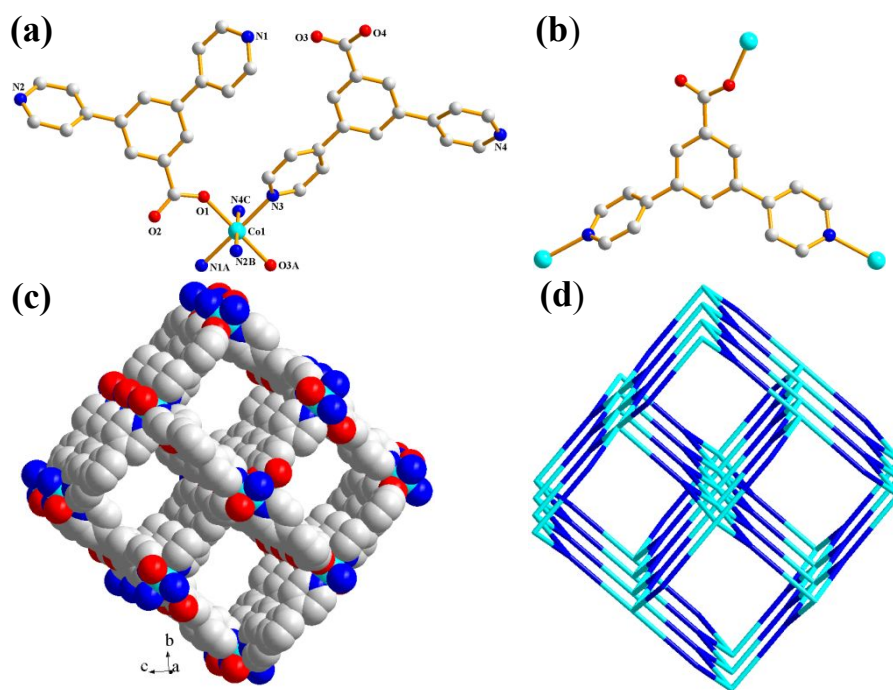

**Figure S1.** (a) Coordination environment of Co(II) ion **1**. (b) Coordination environment of L-H ligand. (c) The 3D framework of **1** viewed along *a* axis. (d) Schematic representations of (3,6)-connected *rtl* framework of **1** with (4·6²)<sub>2</sub>(4²·6<sup>10</sup>·8³) topology.

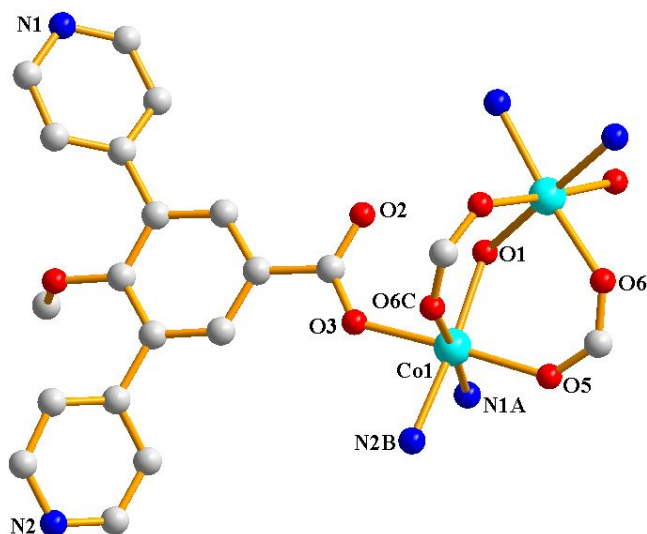

**Figure S2.** Coordination environment of Co(II) ion in **3**.

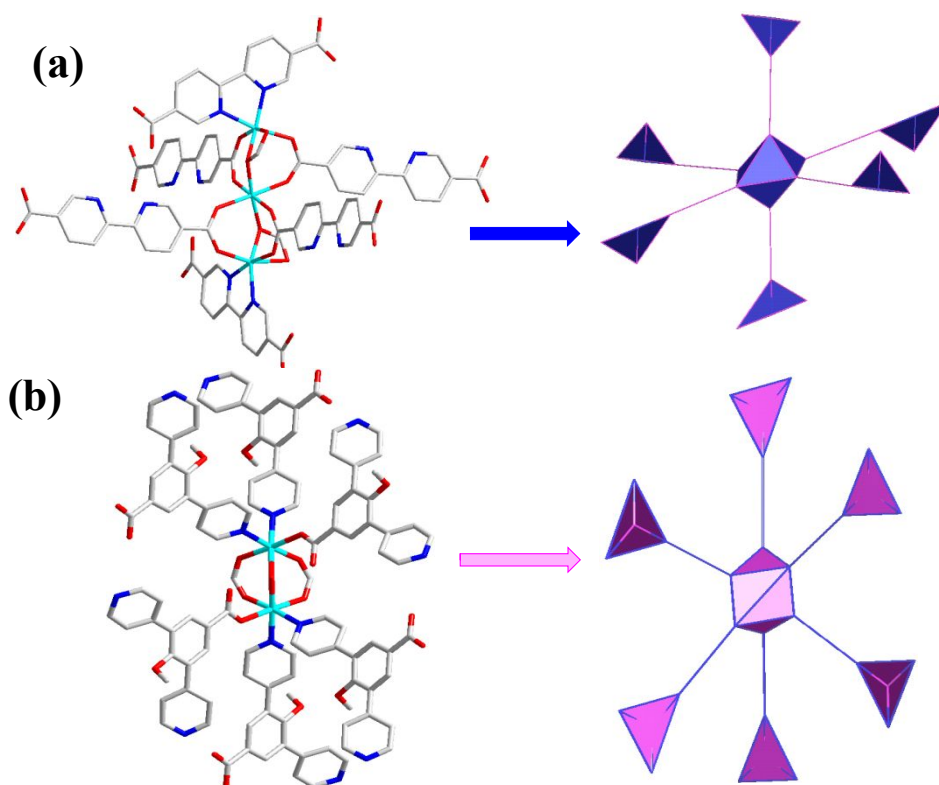

**Figure S3.** Structural comparison of two nodes of JIU-Liu3 (a) and **3** (b) with *ant* topology.

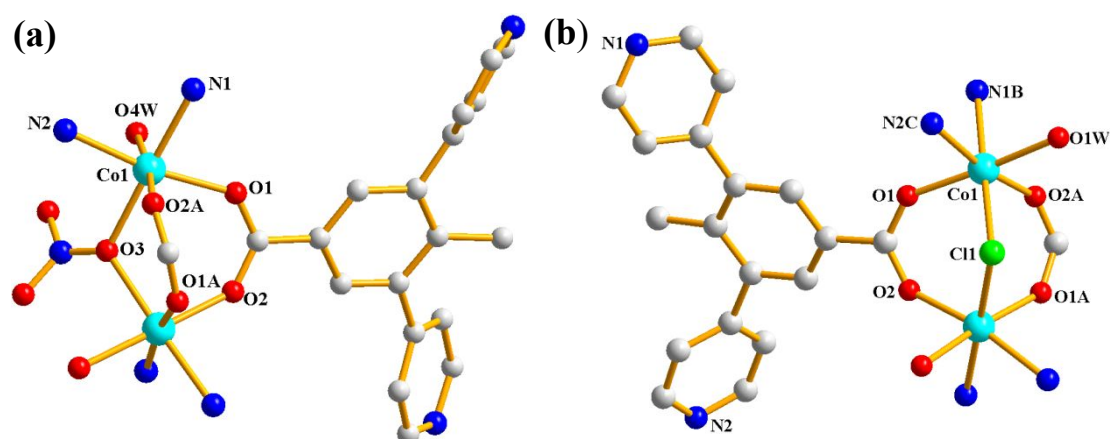

**Figure S4.** Coordination environment of Co(II) ion in **5** (a) and **6** (b).

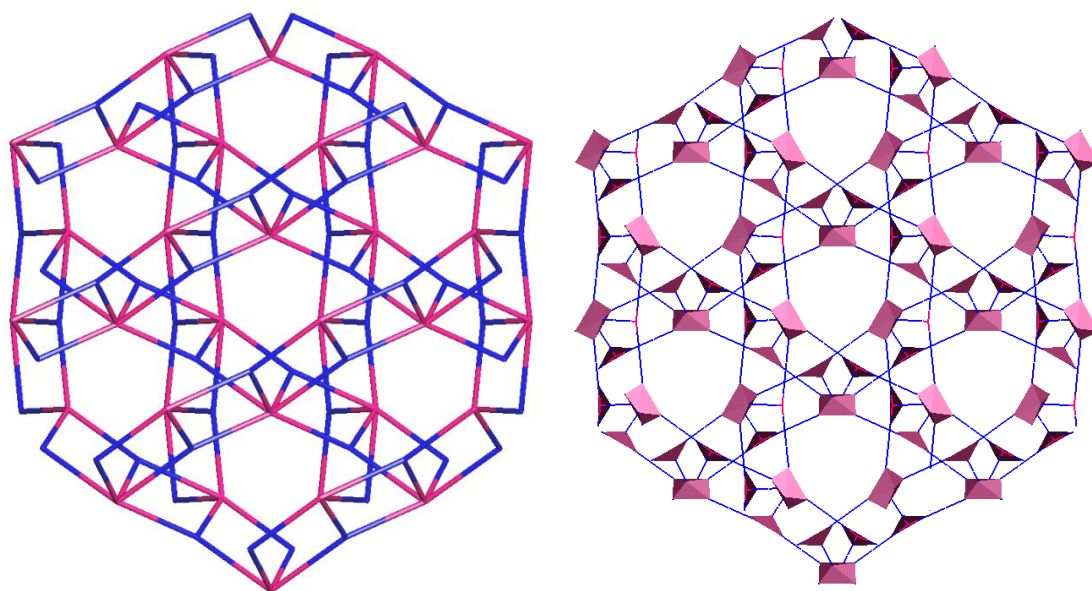

**Figure S5.** The (3,6)-connected 3D net of **5/6** with chiral *anh* topology shown as a stick diagram (left) and as a augmented form (right).

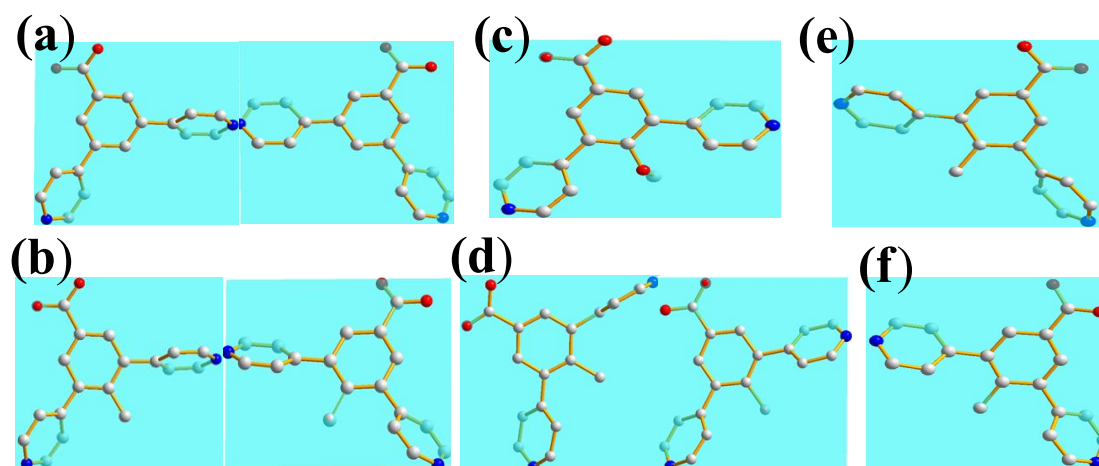

**Figure S6.** Conformation of the three tritopic pyridine-carboxylate linkers in **1-6**. (a, b) Conformation of L-H and L-CH<sub>3</sub> linkers in **1** and **2** (*rtl* net). (c, d) Conformation of L-OCH<sub>3</sub> and L-CH<sub>3</sub> linkers in **3** and **4** (*ant* net). (e, f) Conformation of L-CH<sub>3</sub> linker in **5** and **6** (chiral *anh* net).

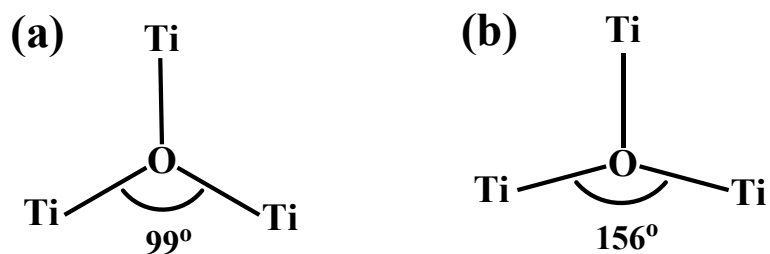

**Figure S7.** Coordination geometry of oxygen atoms in rutile (a) and anatase (b) with (Ti-O-Ti) angle is 99° and 156°, respectively.

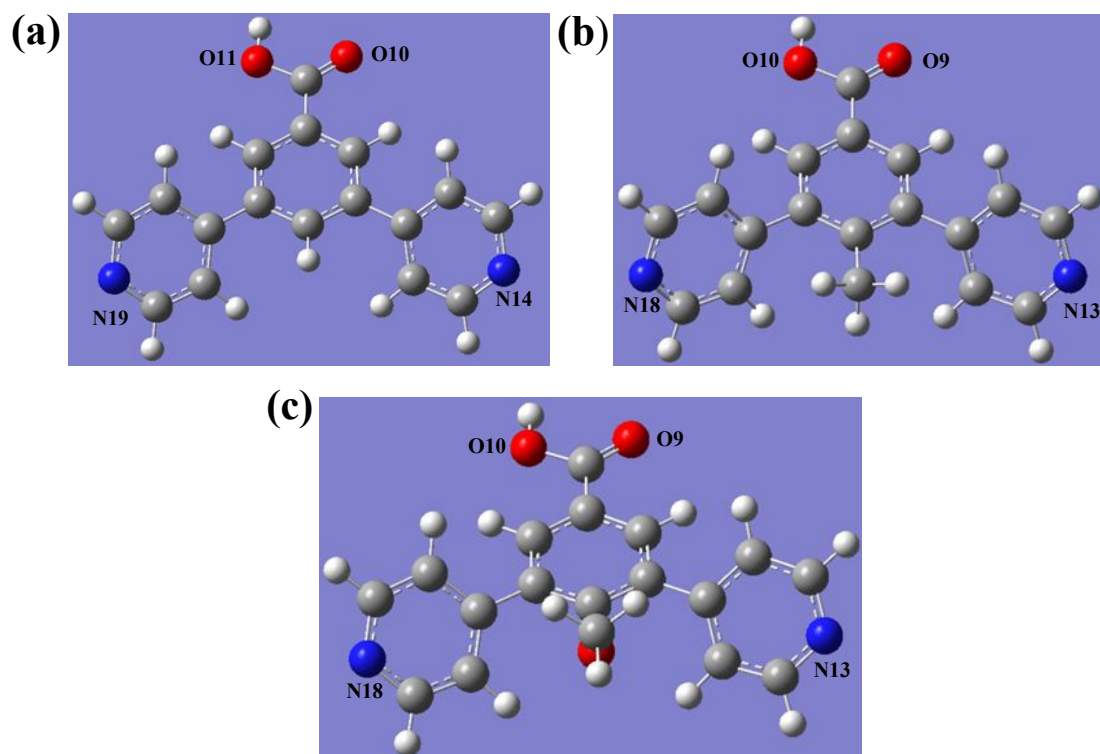

**Figure S8.** The optimized geometry and selected number of atom for tritopic pyridine-carboxylate linkers L-H (a), L-CH<sub>3</sub> (b) and L-OCH<sub>3</sub> (c). (The red, blue, gray and white spheres represent O, N, C and H atoms, respectively).

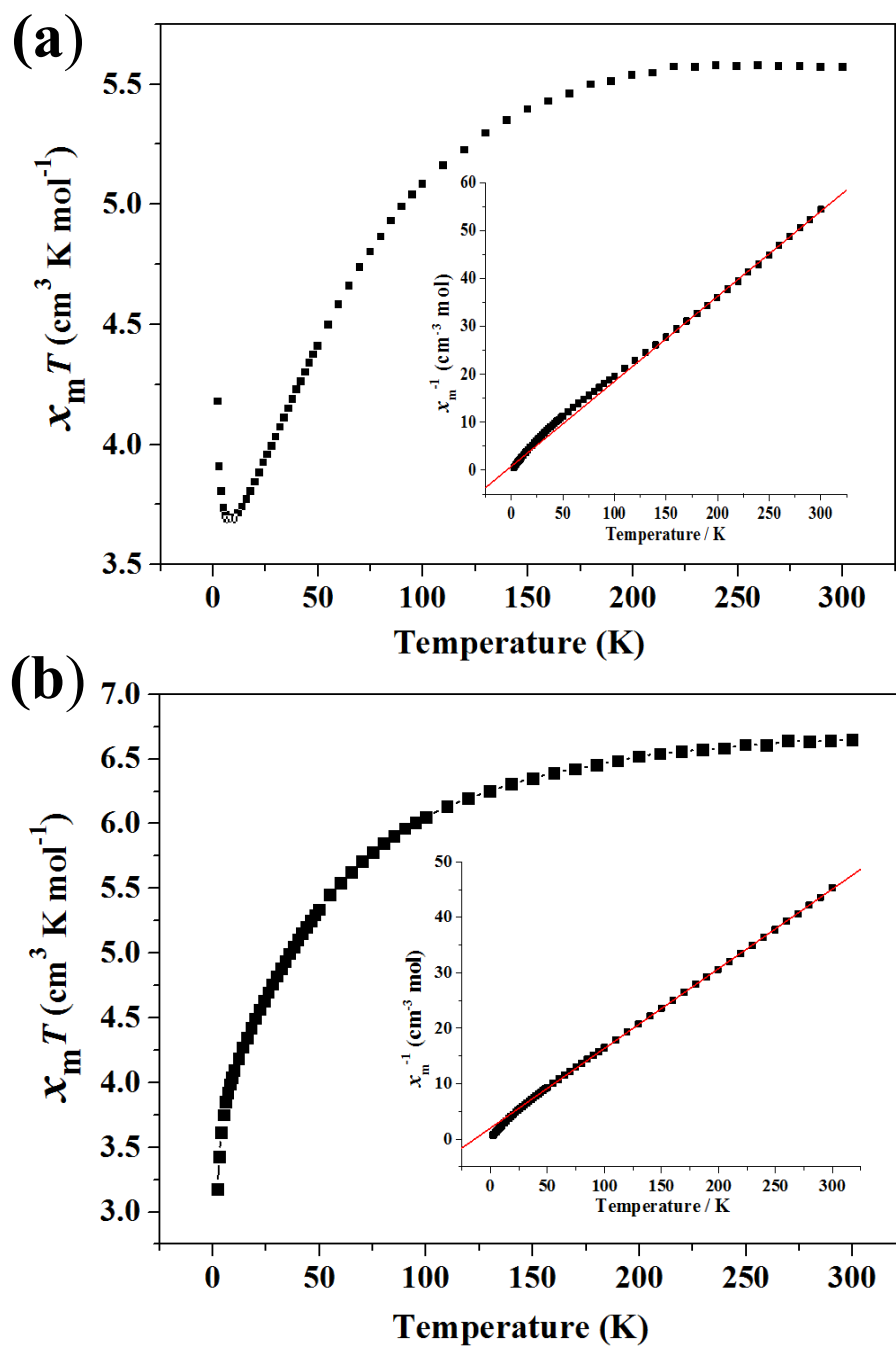

**Figure S9.** The  $\chi_m T$  versus  $T$  curves for **4** (a) and **6** (b) at 1000 Oe. The inset is plots of  $\chi_m^{-1}$  versus  $T$  for **4** and **6** and the red solid line shows the Curie–Weiss fitting.

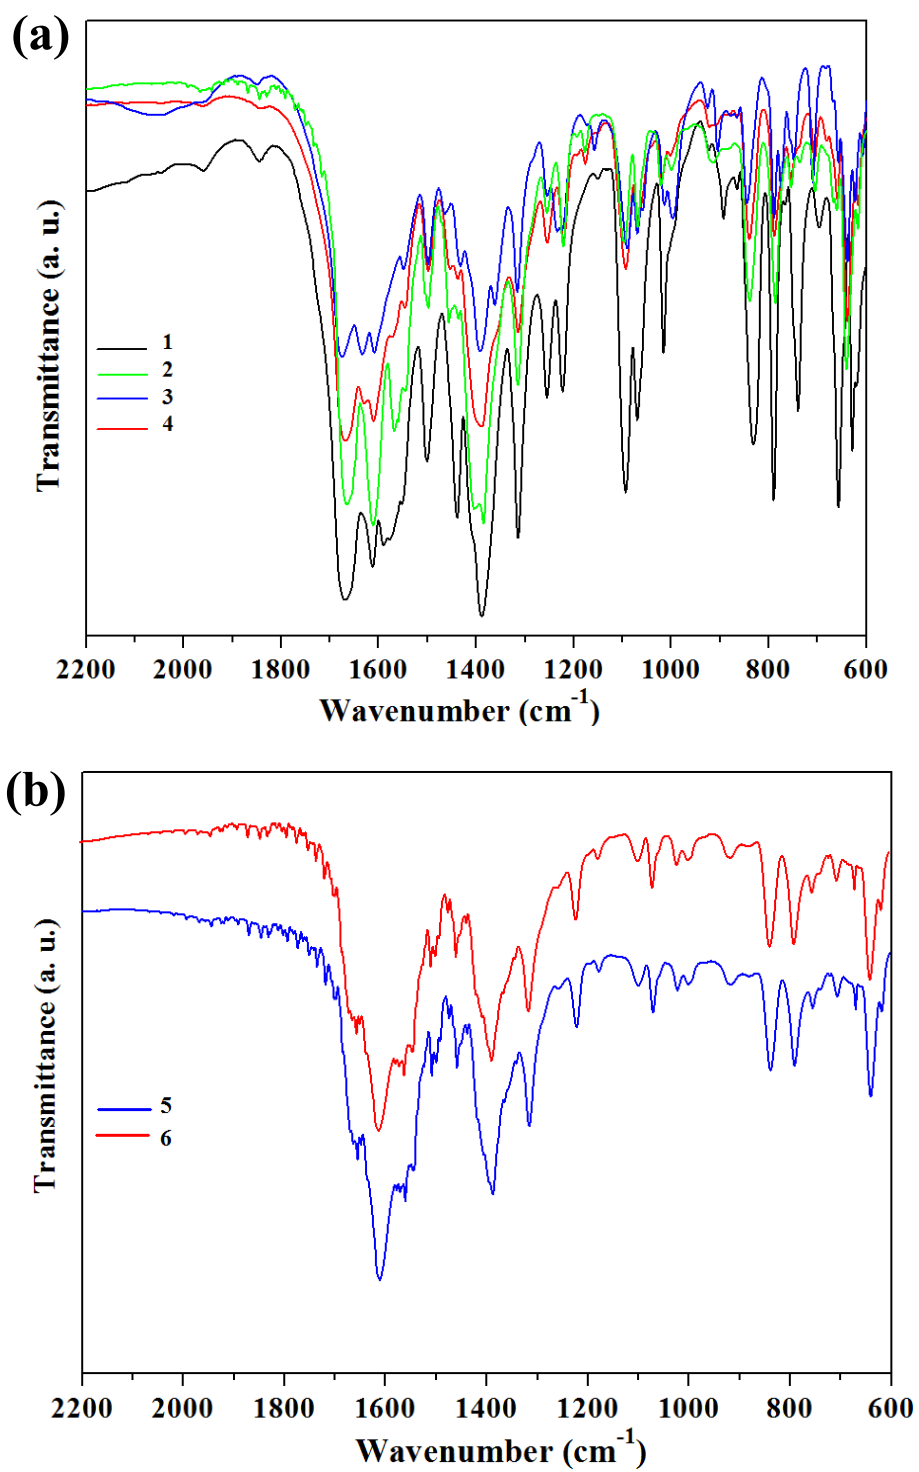

**Figure S10.** The infrared spectra for 1-6.



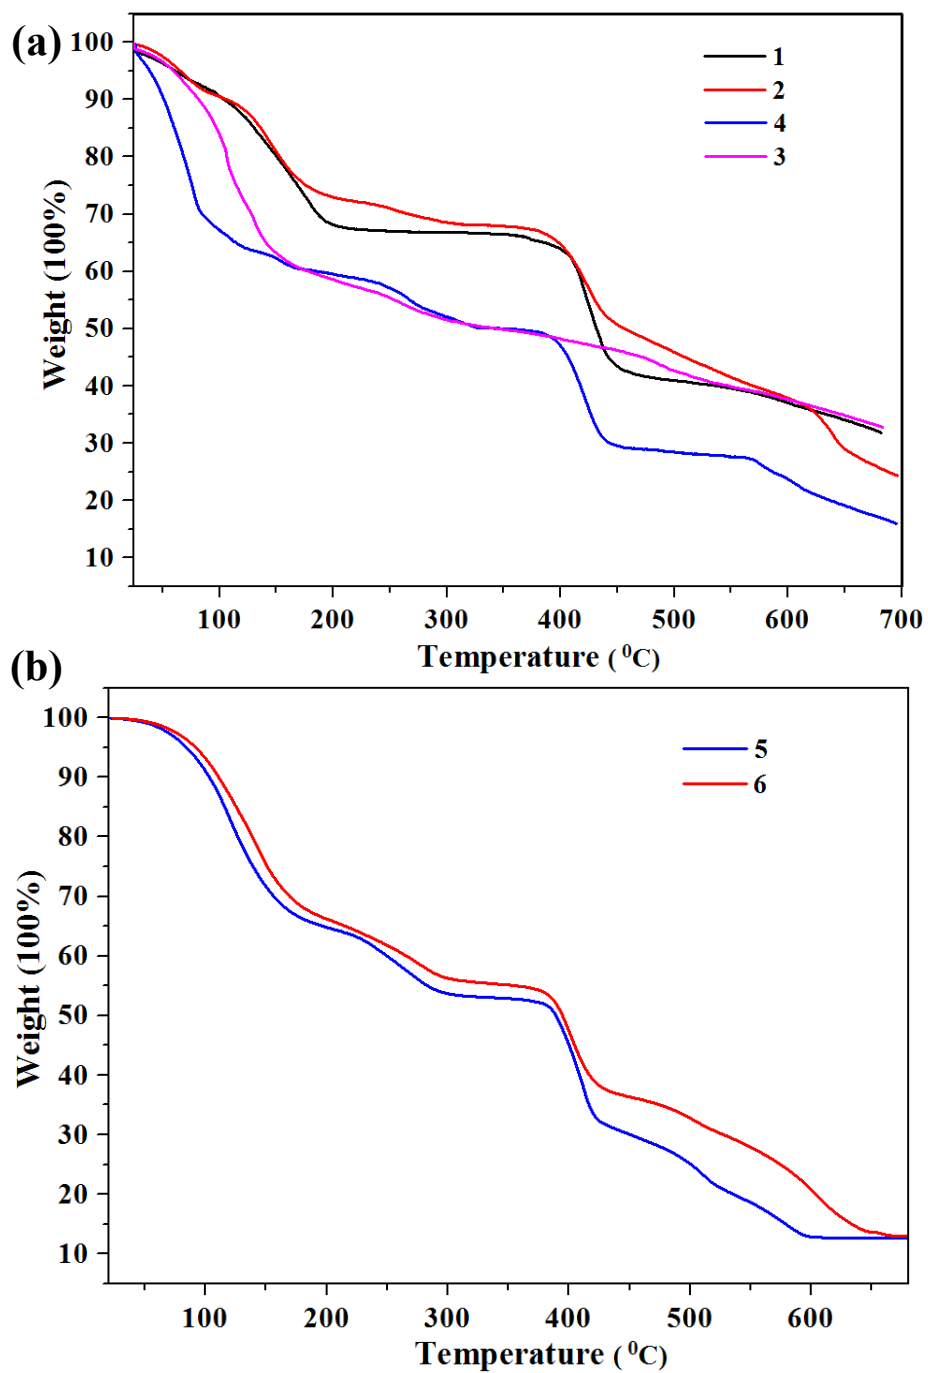

**Figure S11.** TGA data of as-synthesized 1-6.

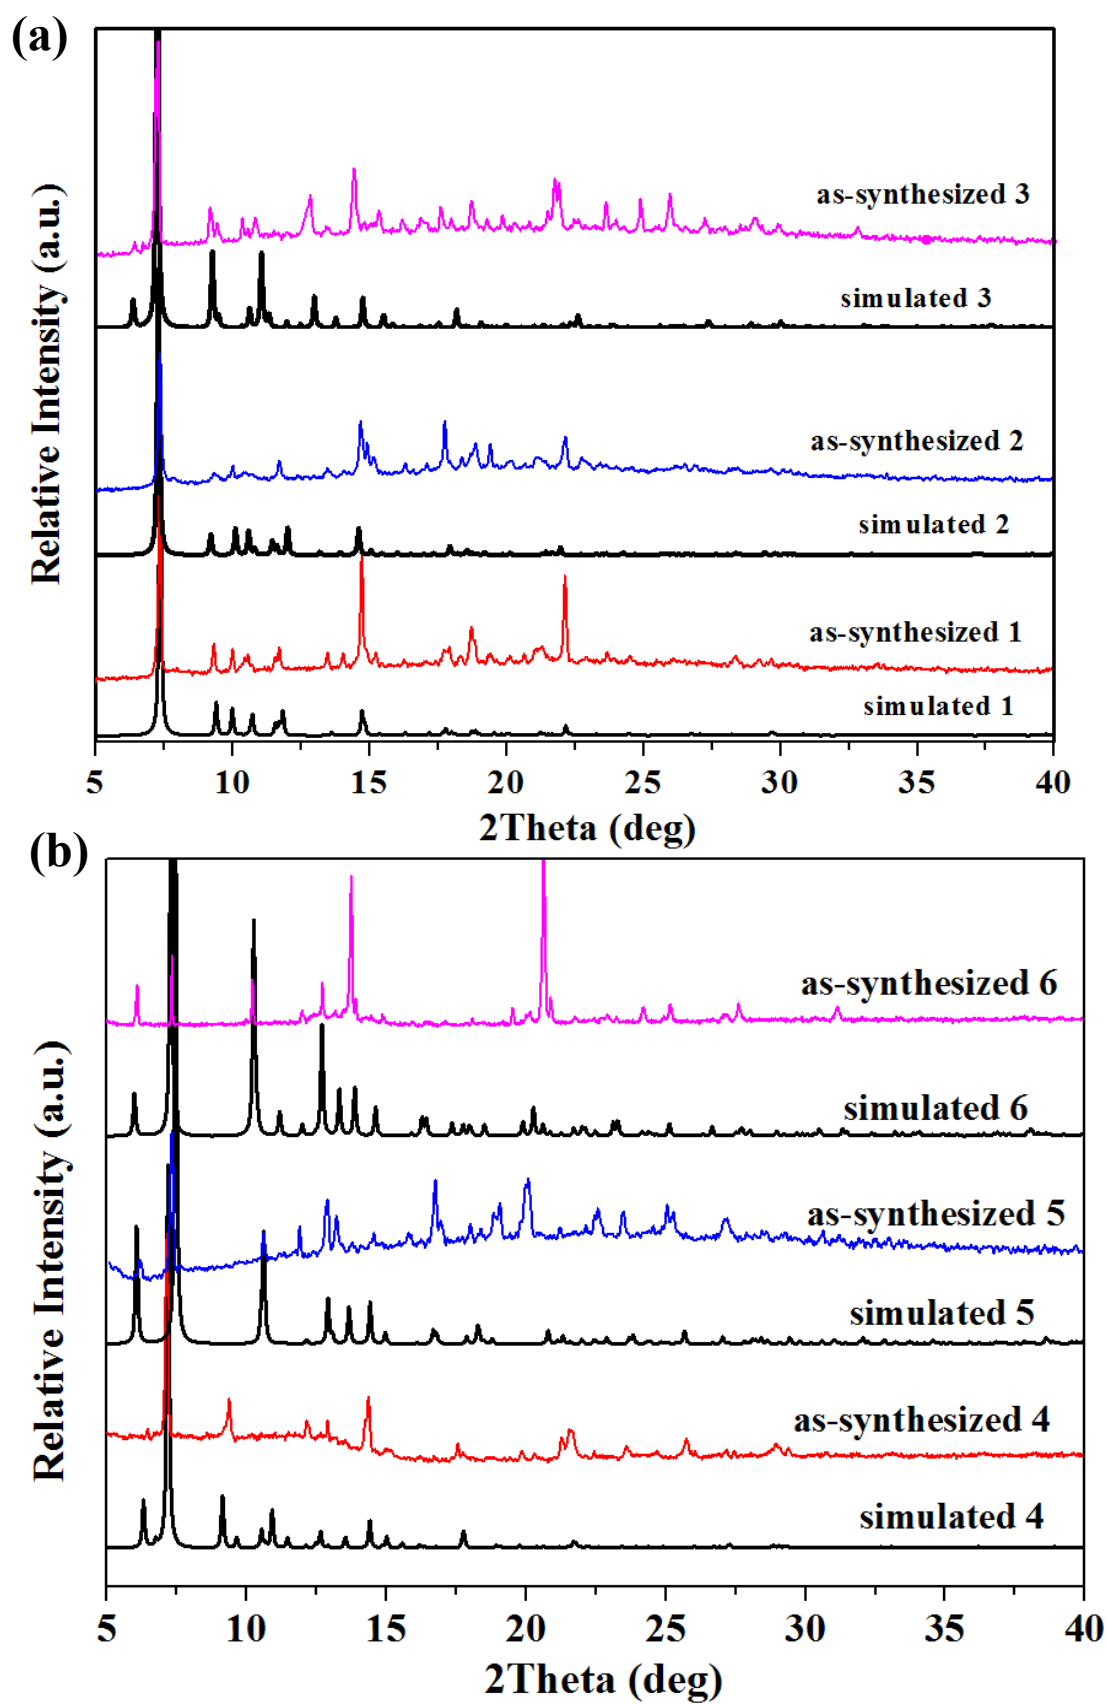

**Figure S12.** The PXRd patterns of 1-6: a simulated PXRd pattern from the single-crystal structure and as-synthesized samples, respectively.

**Table S1.** Summary of Structural Information for **1-6**

| MOFs                         | <b>1, 2</b>                                                                                                                                     | <b>3, 4</b>                                                                                                                                        | <b>5, 6</b>                                                                                                                           |
|------------------------------|-------------------------------------------------------------------------------------------------------------------------------------------------|----------------------------------------------------------------------------------------------------------------------------------------------------|---------------------------------------------------------------------------------------------------------------------------------------|
| linker                       | 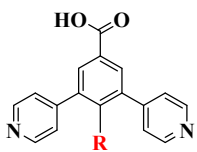 <p>R= -H(<b>1</b>); -CH<sub>3</sub> (<b>2</b>)</p>            |  <p>R= -OCH<sub>3</sub> (<b>3</b>); -CH<sub>3</sub>(<b>4</b>)</p> |  <p>R= -CH<sub>3</sub> (<b>5, 6</b>)</p>           |
| SBU                          |                                                                |                                                                   |                                                    |
| geometry of 6-connected node |  <p>octahedron</p>                                             |  <p>distorted trigonal- prism</p>                                |  <p>significantly distorted trigonal- prism</p>   |
| shape of 3-connected node    |  <p><sup>a</sup><math>\alpha</math>: 133-135°<br/>Y-type</p> |  <p><math>\alpha</math>: 140 -143°<br/>T-type</p>              |  <p><math>\alpha</math>: 151-154°<br/>T-type</p> |
| <sup>b</sup> $\Phi$          | <p><b>1</b>: 27.6°, 40.4°;<br/>38.5°, 60.6°<br/><b>2</b>: 45.0°, 48.5°;<br/>48.6°, 72.6°</p>                                                    | <p><b>3</b>: 34.2°, 42.4°<br/><b>4</b>: 44.8°, 47.7°;<br/>50.2°, 84.9°</p>                                                                         | <p><b>5</b>: 44.7°, 56.2°<br/><b>6</b>: 45.8°, 52.4°</p>                                                                              |
| topology type                |  <p><i>rtl</i> net</p>                                       |  <p><i>ant</i> net</p>                                          |  <p>chiral <i>anh</i> net</p>                    |

<sup>a</sup> $\alpha$ : Three tritopic pyridine-carboxylate ligands can be simplified as tritopic nodes in **1-6** with different open angles ( $\alpha$ ).

<sup>b</sup> $\Phi$ : Dihedral angles ( $\Phi$ ) between the central benzene ring and terminal pyridyl rings.

**Table S2.** Summary of Geometrical Configuration of Nodes for **1-6** and Some (3,6)-connected *rtl*, *ant* and Chiral *anh* Nets Reported

| MOFs                                                                                                                                                                               | shape of tritopic node | geometry of 6-connected node | net        | reference |
|------------------------------------------------------------------------------------------------------------------------------------------------------------------------------------|------------------------|------------------------------|------------|-----------|
| [Zn-(PNMI)]·2DMA                                                                                                                                                                   | Y-shaped               | octahedron                   | <i>rtl</i> | 1         |
| [Cd <sub>3</sub> (SO <sub>4</sub> ) <sub>2</sub> L <sub>2</sub> (H <sub>2</sub> O) <sub>4</sub> ] <sub>n</sub>                                                                     | Y-shaped               | octahedron                   | <i>rtl</i> | 2         |
| [Co <sub>4</sub> (cpna) <sub>4</sub> (H <sub>2</sub> O) <sub>8</sub> ]                                                                                                             | Y-shaped               | octahedron                   | <i>rtl</i> | 3         |
| Mg(int) <sub>2</sub> ·H <sub>2</sub> O                                                                                                                                             | Y-shaped               | octahedron                   | <i>rtl</i> | 4         |
| [Co(L-H) <sub>2</sub> ]·5H <sub>2</sub> O·3DM (1)                                                                                                                                  | Y-shaped               | octahedron                   | <i>rtl</i> | this work |
| [Co(L-CH <sub>3</sub> ) <sub>2</sub> ]·4H <sub>2</sub> O·3DMF (2)                                                                                                                  | Y-shaped               | octahedron                   | <i>rtl</i> | this work |
| {[KCo <sub>3</sub> (C <sub>6</sub> H <sub>4</sub> O <sub>7</sub> )(C <sub>6</sub> H <sub>5</sub> O <sub>7</sub> )(H <sub>2</sub> O) <sub>2</sub> ]·8H <sub>2</sub> O} <sub>n</sub> | Y-shaped               | octahedron                   | <i>ant</i> | 5         |
| Zn/BTB ant                                                                                                                                                                         | Y-shaped               | octahedron                   | <i>ant</i> | 6         |
| [Cu <sub>3</sub> (C <sub>7</sub> H <sub>2</sub> NO <sub>5</sub> ) <sub>2</sub> ] <sub>n</sub>                                                                                      | Y-shaped               | octahedron                   | <i>ant</i> | 7         |
| [Cd(L)Cl]                                                                                                                                                                          | Y-shaped               | octahedron                   | <i>ant</i> | 8         |
| [Co <sub>3</sub> (bpydc) <sub>2</sub> (HCOO) <sub>2</sub> H <sub>2</sub> O]·2DMF (JLU-Liu3)                                                                                        | T-shaped               | octahedron                   | <i>ant</i> | 9         |
| [Zn <sub>3</sub> (bpydc) <sub>2</sub> (HCOO) <sub>2</sub> ]·H <sub>2</sub> O·DMF (JLU-Liu4)                                                                                        | T-shaped               | octahedron                   | <i>ant</i> | 9         |
| Mg(nt) <sub>2</sub>                                                                                                                                                                | T-shaped               | octahedron                   | <i>ant</i> | 4         |
| PPF-25                                                                                                                                                                             | T-shaped               | octahedron                   | <i>ant</i> | 10        |
| [Co <sub>2</sub> (μ-H <sub>2</sub> O)(μ-HCOO) <sub>2</sub> (L-OCH <sub>3</sub> ) <sub>2</sub> ]·5H <sub>2</sub> O·7DMF (3)                                                         | T-shaped               | triogal-prism                | <i>ant</i> | this work |
| [Co <sub>2</sub> (μ-H <sub>2</sub> O)(μ-HCOO) <sub>2</sub> (L-CH <sub>3</sub> ) <sub>2</sub> ]·5H <sub>2</sub> O·7DMF (4)                                                          | T-shaped               | triogal-prism                | <i>ant</i> | this work |
| [Co <sub>2</sub> (cpna) <sub>2</sub> (H <sub>2</sub> O) <sub>3</sub> ]·DMF·9H <sub>2</sub> O                                                                                       | T-shaped               | triogal-prism                | <i>anh</i> | 3         |
| [M <sub>2</sub> (cpna) <sub>2</sub> (H <sub>2</sub> O) <sub>3</sub> ]·0.5H <sub>2</sub> O·DMF                                                                                      | T-shaped               | triogal-prism                | <i>anh</i> | 11        |
| [Co <sub>2</sub> (μ-NO <sub>3</sub> )(L-CH <sub>3</sub> ) <sub>2</sub> (H <sub>2</sub> O) <sub>2</sub> ](NO <sub>3</sub> )·3H <sub>2</sub> O·8DMF (5)                              | T-shaped               | triogal-prism                | <i>anh</i> | this work |
| [Co <sub>2</sub> (μ-Cl)(L-CH <sub>3</sub> ) <sub>2</sub> (H <sub>2</sub> O) <sub>2</sub> ](NO <sub>3</sub> )·5H <sub>2</sub> O·8DMF (6)                                            | T-shaped               | triogal-prism                | <i>anh</i> | this work |

1. Medishetty, R.; Jung, D.; Song, X.; Kim, D.; Lee, S. S.; Lah, M. S.; Vittal, J. J. Solvent-induced structural dynamics in noninterpenetrating porous coordination polymeric networks. *Inorg. Chem.* **2013**, *52*, 2951-2957.
2. Zhou, W. W.; Zhao, W.; Wang, F. W.; Fang, W. Y.; Liu, D. F.; Wei, Y. J.; Xu, M.; Zhao, X.; Liang, X. A 3D metal–organic framework with a rutile topology network, right- or left- handed helical chains and tunable UV-to-visible photoluminescence. *RSC Adv.* **2015**, *5*, 42616-42620.
3. Hou, L.; Liu, B.; Jia, L. N.; Wei, L.; Wang, Y. Y.; Shi, Q. Z. Two new (3,6)-connected frameworks based on an unsymmetrical tritopic pyridyldicarboxylate ligand and Co<sub>2</sub> dimer: structures, magnetic, and sorption properties. *Crystal Growth Des.* **2012**, *13*, 701-707.
4. Liu, T.; Luo, D.; Xu, D.; Zeng, H.; Lin, Z. An open-framework rutile-type magnesium isonicotinate and its structural analogue with an anatase topology. *Dalton Trans.* **2013**, *42*, 368-371.
5. Xiang, S.; Wu, X.; Zhang, J.; Fu, R.; Hu, S.; Zhan, X. A 3D canted antiferromagnetic porous metal–organic framework with anatase topology through assembly of an analogue of polyoxometalate. *J. Am. Chem. Soc.* **2005**, *127*, 16352-16353.
6. Caskey, S. R.; Wong-Foy, A. G.; Matzger, A. J. Phase selection and discovery among five assembly modes in a coordination polymerization. *Inorg. Chem.* **2008**, *47*, 7751-7756.
7. Zou, J. P.; Peng, Q.; Wen, Z.; Zeng, G. S.; Xing, Q. J.; Guo, G. C. Two novel metal–organic frameworks (MOFs) with (3,6)-connected net topologies: syntheses, crystal structures, third-order nonlinear optical and luminescent properties. *Crystal Growth Des.* **2010**, *10*, 2613-2619.
8. Ji, C.; Li, B.; Ma, M. L.; Zang, S. Q.; Hou, H. W.; Mak, T. C. W. A series of five divalent zinc and cadmium coordination polymers based on a new bifunctional ligand: syntheses, crystal structures, and properties. *CrystEngComm* **2012**, *14*, 3951-3958.
9. Wang, J.; Luo, J.; Zhao, J.; Li, D. S.; Li, G.; Huo, Q.; Liu, Y. L. Assembly of two flexible metal–organic frameworks with stepwise gas adsorption and highly selective

CO<sub>2</sub> adsorption. *Crystal Growth Des.* **2014**, *14*, 2375-2380.

10. Verduzco, J. M.; Chung, H.; Hu, C.; Choe, W. Metal-organic framework assembled from T-shaped and octahedral nodes: a mixed-linker strategy to create a rare anatase TiO<sub>2</sub> topology. *Inorg. Chem.* **2009**, *48*, 9060-9062.

11. Hou, J. J.; Zhang, R.; Qin, Y. L.; Zhang, X. M. From (3,6)-connected *kgd*, chiral *anh* to (3,8)-connected tfz-d nets in low nuclear metal cluster-based networks with triangular pyridinedicarboxylate ligand. *Crystal Growth Des.* **2013**, *13*, 1618-1625.
